# Supplementary material for: Effects of Butadiene Sulfone as an Electrolyte Additive on the Formation of Solid Electrolyte Interphase in Lithium-Ion Batteries Based on Li4Ti5O12 Anode Materials
Source: MDPI journal article supplement (doi:10.3390/polym15081965), 2023-04-21
Supplement: s1 [file s1]

## Supporting Information

### Effects of Butadiene Sulfone on the Formation of Solid Electrolyte Interphase in Lithium-ion Batteries based on $\text{Li}_4\text{Ti}_5\text{O}_{12}$ Anode Materials

Yu-Ruei Kung<sup>\*,1</sup>, Cheng-Yao Li<sup>1</sup>, Panitat Hasin<sup>\*,2</sup> Chia-Hung Su<sup>3</sup> and Jeng-Yu Lin<sup>3,4,\*</sup>

<sup>\*</sup>Corresponding authors

<sup>1</sup> Department of Chemical Engineering and Biotechnology, Tatung University (TTU), 40. Sec.3, Zhong Shan N. Rd., Taipei, 104327, Taiwan (R.O.C.)

<sup>2</sup> Department of Chemistry and Center of Excellence for Innovation in Chemistry (PERCH-CIC), Ministry of Higher Education, Science, Research and Innovation, Faculty of Science, Kasetsart University, Bangkok 10900, Thailand

<sup>3</sup> Research Center for Chinese Herbal Medicine, Ming Chi University of Technology, New Taipei City 24301, Taiwan

<sup>4</sup> Department of Chemical and Materials Engineering, Tunghai University (THU), No. 1727, Sec. 4, Taiwan Boulevard, Xitun District, Taichung City 407224, Taiwan (R.O.C)  
E-mail: yrkung@gm.ttu.edu.tw; fscipths@ku.ac.th; jylin@thu.edu.tw

**Table S1** The assignments of the characteristic bands observed in ATR-FTIR spectra

| Band-description                    | Transmittance Peak ( $\text{cm}^{-1}$ ) | Possible assignments     |
|-------------------------------------|-----------------------------------------|--------------------------|
| P-F                                 | 798                                     | $\text{Li}_x\text{PF}_y$ |
| C-H                                 | 2800-2950                               | $\text{ROCO}_2\text{Li}$ |
| C-O                                 | 1039                                    | $\text{ROCO}_2\text{Li}$ |
| -C=O                                | 1600                                    | $\text{ROCO}_2\text{Li}$ |
| C-F                                 | 1310                                    | PVDF                     |
| C-H, O-CO <sub>2</sub> (overlapped) | 1405                                    | $\text{ROCO}_2\text{Li}$ |
| CO <sub>3</sub> (asymm. str.)       | 1476                                    | $\text{Li}_2\text{CO}_3$ |
| CO <sub>3</sub> (out-of plane vib.) | 836                                     | $\text{Li}_2\text{CO}_3$ |
| CO <sub>2</sub>                     | 1476                                    | $\text{ROCO}_2\text{Li}$ |

**Table S2** The assignments of the characteristic bands observed in XPS spectra

| Peak Position | Binding energy BE (eV) | Assignment                                  | Reference  |
|---------------|------------------------|---------------------------------------------|------------|
| <b>C 1s</b>   | 284.5                  | sp <sup>2</sup> carbon of carbon black (CB) | 16, 39, 42 |
|               | 286.1                  | sp <sup>3</sup> carbon of carbon black (CB) |            |
|               | 290.6                  | PVDF                                        |            |
|               | 289.7                  | Li <sub>2</sub> CO <sub>3</sub>             |            |
|               | 291.6                  | ROCO <sub>2</sub> Li                        |            |
| <b>F 1s</b>   | 687.8                  | PVDF                                        | 42, 43     |
|               | 684.2                  | LiF                                         |            |
|               | 685.0                  | Li <sub>x</sub> PF <sub>y</sub>             |            |
| <b>O 1s</b>   | 530.7                  | LTO                                         | 42, 44     |
|               | 532.4                  | LTO                                         |            |
|               | 529.0                  | LiSO <sub>3</sub>                           |            |
|               | 530.8                  | Li <sub>2</sub> CO <sub>3</sub>             |            |
|               | 531.5                  | Phosphate group                             |            |
|               | 532.4                  | ROCO <sub>2</sub> Li                        |            |
| <b>P 2p</b>   | 132.5                  | Phosphate group                             | 44         |
| <b>S 2p</b>   | 168.0                  | Li <sub>2</sub> SO <sub>3</sub>             | 44,45      |
